# Supplementary material
Source: PubMed Central journal article supplement (PMC10272281)
Supplement: NIHMS1866050-supplement-2.pdf [file NIHMS1866050-supplement-2.pdf]

SUPPLEMENTAL TABLES

| Characteristics                                     | Chemotherapy (n=1500) | Immunotherapy (n=132) | p-value |
|-----------------------------------------------------|-----------------------|-----------------------|---------|
| <b>Pathologic T stage, no. (%)</b>                  |                       |                       |         |
| T0/Tis                                              | 187 (12.5%)           | 9 (6.8%)              |         |
| T1a                                                 | 39 (2.6%)             | 5 (3.8%)              |         |
| T1b                                                 | 156 (10.4%)           | 7 (5.3%)              |         |
| T1c                                                 | 187 (12.5%)           | 19 (14.4%)            | 0.18    |
| T2a                                                 | 272 (18.1%)           | 26 (19.7%)            |         |
| T2b                                                 | 185 (12.3%)           | 20 (15.2%)            |         |
| T3                                                  | 298 (19.9%)           | 32 (24.2%)            |         |
| T4                                                  | 172 (11.5%)           | 12 (9.1%)             |         |
| Unknown                                             | 4 (0.3%)              | 2 (1.5%)              |         |
| <b>Pathologic N stage, no. (%)</b>                  |                       |                       |         |
| N0                                                  | 686 (54.2%)           | 46 (54.8%)            |         |
| N1                                                  | 221 (17.5%)           | 19 (22.6%)            | 0.54    |
| N2                                                  | 356 (28.1%)           | 19 (22.6%)            |         |
| N3                                                  | 2 (0.2%)              | 0 (0.0%)              |         |
| Unknown                                             | 235                   | 48                    |         |
| <b>Pathologic M stage, no. (%)</b>                  |                       |                       |         |
| M0                                                  | 483 (97.6%)           | 68 (98.9%)            | 0.61    |
| M1                                                  | 12 (2.4%)             | 1 (1.5%)              |         |
| Unknown                                             | 1005                  | 63                    |         |
| <b>Nodal upstaging, no. (%)</b>                     | 95 (6.5%)             | 12 (9.3%)             | 0.22    |
| <b>Nodal downstaging, no. (%)</b>                   | 569 (49.8%)           | 25 (30.1%)            | 0.001   |
| <b>Lymph nodes examined, no. (%)</b>                | 1469 (98.1%)          | 129 (97.7%)           | 0.79    |
| <b>Number of lymph nodes examined (median, IQR)</b> | 14.0 (8.0, 24.0)      | 17.0 (11.0, 28.5)     | 0.005   |
| <b>Surgical margin, no. (%)</b>                     |                       |                       | 0.78    |
| Negative                                            | 1409 (94.8%)          | 124 (95.4%)           |         |
| Positive                                            | 77 (5.2%)             | 6 (4.6%)              |         |
| Unknown                                             | 14                    | 2                     |         |
| <b>Length of stay, (median IQR)</b>                 | 4.0 (3.0, 6.0)        | 4.0 (3.0, 6.0)        | 0.042   |
| <b>30-day readmission, no. (%)</b>                  |                       |                       |         |
| No                                                  | 1441 (96.6%)          | 124 (94.7%)           | 0.26    |
| Yes                                                 | 51 (3.4%)             | 7 (5.3%)              |         |
| Unknown                                             | 8                     | 1                     |         |
| <b>30-day mortality, no. (%)</b>                    |                       |                       |         |
| No                                                  | 1255 (98.8%)          | 68 (97.1%)            | 0.22    |
| Yes                                                 | 15 (1.2%)             | 2 (2.9%)              |         |
| Unknown                                             | 230                   | 62                    |         |
| <b>90-day mortality, no. (%)</b>                    |                       |                       |         |
| No                                                  | 1219 (96.3%)          | 68 (97.1%)            | 0.71    |
| Yes                                                 | 47 (3.7%)             | 2 (2.9%)              |         |
| Unknown                                             | 234                   | 62                    |         |
| <b>Resection approach, no. (%)</b>                  |                       |                       |         |
| VATS                                                | 1036 (69.1%)          | 72 (54.5%)            | <0.001  |
| Robot                                               | 464 (30.9%)           | 60 (45.5%)            |         |
| <b>Conversion, no. (%)</b>                          | 220 (14.7%)           | 18 (13.6%)            | 0.75    |

Supplemental Table I. Pathological characteristics and perioperative outcomes of the subcohort of patients with clinical stage I-III NSCLC undergoing minimally invasive lobectomy after neoadjuvant chemotherapy vs neoadjuvant immunotherapy.

| Characteristics                                     | Open Lobectomy (n=86) | MIS Lobectomy (n=132) | p-value |
|-----------------------------------------------------|-----------------------|-----------------------|---------|
| <b>Pathologic T stage, no. (%)</b>                  |                       |                       |         |
| T0/Tis                                              | 6 (7.0%)              | 9 (6.8%)              | 0.21    |
| T1a                                                 | 3 (3.5%)              | 5 (3.8%)              |         |
| T1b                                                 | 9 (10.5%)             | 7 (5.3%)              |         |
| T1c                                                 | 10 (11.6%)            | 19 (14.4%)            |         |
| T2a                                                 | 13 (15.1%)            | 26 (19.7%)            |         |
| T2b                                                 | 13 (15.1%)            | 20 (15.2%)            |         |
| T3                                                  | 14 (16.3%)            | 32 (24.2%)            |         |
| T4                                                  | 18 (20.9%)            | 12 (9.1%)             |         |
| Unknown                                             | 0 (0.0%)              | 2 (1.5%)              |         |
| <b>Pathologic N stage, no. (%)</b>                  |                       |                       |         |
| N0                                                  | 31 (70.5%)            | 46 (54.8%)            | 0.22    |
| N1                                                  | 6 (13.6%)             | 19 (22.6%)            |         |
| N2                                                  | 7 (15.9%)             | 19 (22.6%)            |         |
| Unknown                                             | 42                    | 48                    |         |
| <b>Pathologic M stage, no. (%)</b>                  |                       |                       |         |
| M0                                                  | 33 (100.0%)           | 68 (98.6%)            | 0.49    |
| M1                                                  | 0 (0.0%)              | 1 (1.5%)              |         |
| Unknown                                             | 53                    | 63                    |         |
| <b>Nodal upstaging, no. (%)</b>                     | 4 (4.8%)              | 12 (9.3%)             | 0.29    |
| <b>Nodal downstaging, no. (%)</b>                   | 21 (43.8%)            | 25 (30.1%)            | 0.12    |
| <b>Lymph nodes examined, no. (%)</b>                | 82 (95.3%)            | 129 (97.7%)           | 0.33    |
| <b>Number of lymph nodes examined (median, IQR)</b> | 17.0 (11.0, 26.0)     | 17.0 (11.0, 28.5)     | 0.76    |
| <b>Surgical margin, no. (%)</b>                     |                       |                       |         |
| Positive                                            | 79 (92.9%)            | 124 (95.4%)           | 0.45    |
| Negative                                            | 6 (7.1%)              | 6 (4.6%)              |         |
| Unknown                                             | 1                     | 2                     |         |
| <b>Length of stay (median IQR)</b>                  | 4.0 (3.0, 7.0)        | 4.0 (3.0, 6.0)        | 0.11    |
| <b>Readmission (30 day), no. (%)</b>                |                       |                       |         |
| No                                                  | 80 (93.0%)            | 124 (94.7%)           | 0.62    |
| Yes                                                 | 6 (7.0%)              | 7 (5.3%)              |         |
| Unknown                                             | 0                     | 1                     |         |
| <b>30-day mortality, no. (%)</b>                    |                       |                       |         |
| No                                                  | 40 (100.0%)           | 68 (97.1%)            | 0.28    |
| Yes                                                 | 0 (0.0%)              | 2 (2.9%)              |         |
| Unknown                                             | 46                    | 62                    |         |
| <b>90-day mortality, no. (%)</b>                    |                       |                       |         |
| No                                                  | 39 (97.5%)            | 68 (97.1%)            | 0.91    |
| Yes                                                 | 1 (2.5%)              | 2 (2.9%)              |         |
| Unknown                                             | 46                    | 62                    |         |

578

579

580

581

582

583

584

**Supplemental Table II. Pathological characteristics and perioperative outcomes of the subcohort of patients with clinical stage I-III NSCLC undergoing minimally invasive vs open lobectomy after neoadjuvant immunotherapy.**
